# Supplementary material for: 2-Hydroxyarylimidazole-based colorimetric and ratiometric fluoride ion sensors
Source: Royal Society of Chemistry journal article supplement (doi:10.1039/c4ra10482j), 2014-10-24
Supplement: c4ra10482j1.pdf [file c4ra10482j1.pdf]

## 2-Hydroxyarylimidazole based Colorimetric and Ratiometric Fluoride ion Sensors

Dhirendra Kumar and K. R. Justin Thomas

<sup>a</sup> *Organic Materials Laboratory, Department of Chemistry, Indian Institute of Technology Roorkee, Roorkee - 247 667, India. krjtfcy8@iitr.ac.in, krjtiitk@gmail.com*

### Supplementary Information Contents

|                                                                                                                               |     |
|-------------------------------------------------------------------------------------------------------------------------------|-----|
| <b>Fig. S1.</b> Absorption spectra of <b>4a</b> after addition of 20 equiv. of different anions recorded in ACN               | S3  |
| <b>Fig. S2.</b> Absorption spectra of <b>4a</b> + $F^-$ (20 equiv.) on addition of different amount of MeOH recorded in ACN   | S3  |
| <b>Fig. S3.</b> Absorption spectra of <b>4a</b> + $AcO^-$ (20 equiv.) on addition of different amount of MeOH recorded in ACN | S4  |
| <b>Fig. S4.</b> Absorption spectra of <b>4a</b> after addition of 20 equiv. of different anions recorded in MeOH+ACN (1% v/v) | S4  |
| <b>Fig. S5.</b> Absorption spectra of <b>4b</b> after addition of 20 equiv. of different anions recorded in ACN               | S5  |
| <b>Fig. S6.</b> Absorption spectra of <b>4b</b> + $F^-$ (20 equiv.) on addition of different amount of MeOH recorded in ACN   | S5  |
| <b>Fig. S7.</b> Absorption spectra of <b>4b</b> + $AcO^-$ (20 equiv.) on addition of different amount of MeOH recorded in ACN | S6  |
| <b>Fig. S8.</b> Absorption spectra of <b>4b</b> after addition of 20 equiv. of different anions recorded in MeOH+ACN (4% v/v) | S6  |
| <b>Fig. S9.</b> Emission spectra of <b>4a</b> after addition of 20 equiv. of different anions recorded in ACN                 | S7  |
| <b>Fig. S10.</b> Emission spectra of <b>4a</b> + $F^-$ (20 equiv.) on addition of different amount of MeOH recorded in ACN    | S7  |
| <b>Fig. S11.</b> Emission spectra of <b>4a</b> + $AcO^-$ (20 equiv.) on addition of different amount of MeOH recorded in ACN  | S8  |
| <b>Fig. S12.</b> Emission spectra of <b>4a</b> after addition of 20 equiv. of different anions recorded in MeOH+ACN (1% v/v)  | S8  |
| <b>Fig. S13.</b> Emission spectra of <b>4b</b> after addition of 20 equiv. of different anions recorded in ACN                | S9  |
| <b>Fig. S14.</b> Emission spectra of <b>4b</b> + $F^-$ (20 equiv.) on addition of different amount of MeOH recorded in ACN    | S9  |
| <b>Fig. S15.</b> Emission spectra of <b>4b</b> + $AcO^-$ (20 equiv.) on addition of different amount of MeOH recorded in ACN  | S10 |
| <b>Fig. S16.</b> Emission spectra of <b>4b</b> after addition of 20 equiv. of different anions                                | S10 |

recorded in MeOH+ACN (4% v/v)

|                                                                                                   |     |
|---------------------------------------------------------------------------------------------------|-----|
| <b>Fig. S17.</b> Job's plot for <b>4a</b> + $F^-$ ; [receptor] + [guest] = $2 \times 10^{-5}$ M   | S11 |
| <b>Fig. S18.</b> Job's plot for <b>4a</b> + $AcO^-$ ; [receptor] + [guest] = $2 \times 10^{-5}$ M | S11 |
| <b>Fig. S19.</b> Job's plot for <b>4b</b> + $F^-$ ; [receptor] + [guest] = $2 \times 10^{-5}$ M   | S12 |
| <b>Fig. S20.</b> Job's plot for <b>4b</b> + $AcO^-$ ; [receptor] + [guest] = $2 \times 10^{-5}$ M | S12 |
| <b>Fig. S21.</b> IR of <b>4a</b> only (top) and <b>4a</b> + TBAF (bottom)                         | S13 |
| <b>Fig. S22.</b> IR of <b>4b</b> only (top) and <b>4b</b> + TBAF (bottom)                         | S14 |
| Detection limit calculation                                                                       | S15 |
| <b>Fig. S23.</b> $^1H$ NMR spectra of <b>2</b> recorded in $CDCl_3$                               | S16 |
| <b>Fig. S24.</b> $^{13}C$ NMR spectra of <b>2</b> recorded in $CDCl_3$                            | S16 |
| <b>Fig. S25.</b> $^1H$ NMR spectra of <b>3</b> recorded in $CDCl_3$                               | S17 |
| <b>Fig. S26.</b> $^{13}C$ NMR spectra of <b>3</b> recorded in $CDCl_3$                            | S17 |
| <b>Fig. S27.</b> $^1H$ NMR spectra of <b>4a</b> recorded in $DMSO-d_6$                            | S18 |
| <b>Fig. S28.</b> $^{13}C$ NMR spectra of <b>4a</b> recorded in $CDCl_3$                           | S18 |
| <b>Fig. S29.</b> $^1H$ NMR spectra of <b>4b</b> recorded in $DMSO-d_6$                            | S19 |
| <b>Fig. S30.</b> $^{13}C$ NMR spectra of <b>4b</b> recorded in $CDCl_3$                           | S19 |

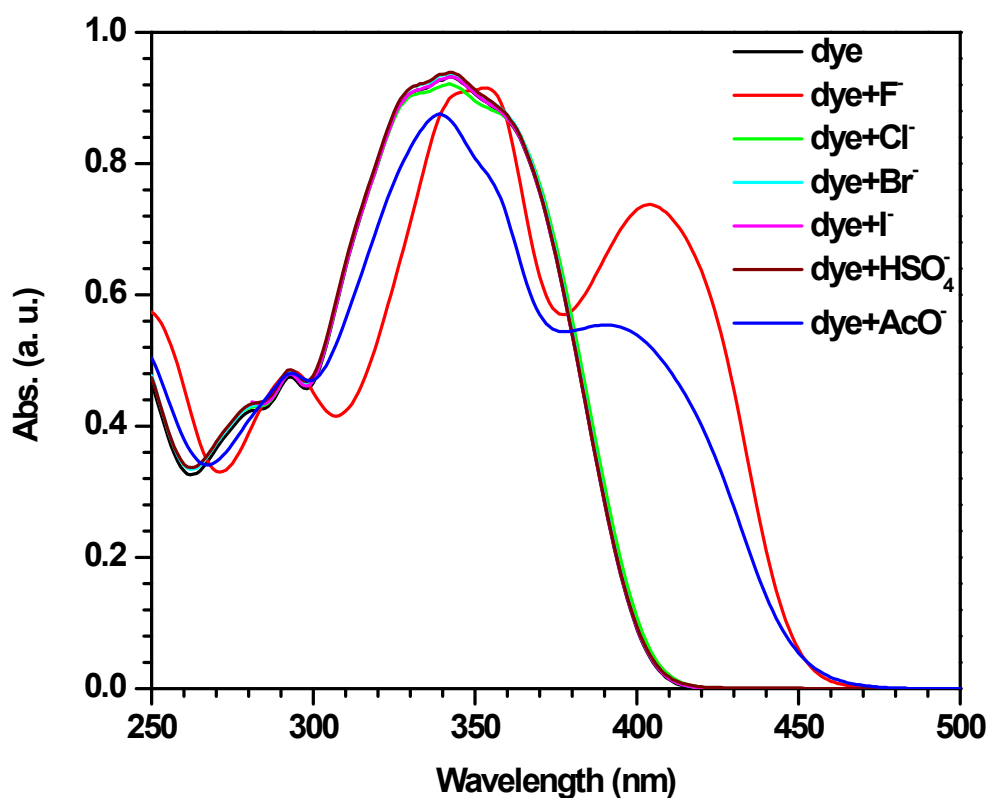

Fig. S1. Absorption spectra of **4a** after addition of 20 equiv. of different anions recorded in ACN

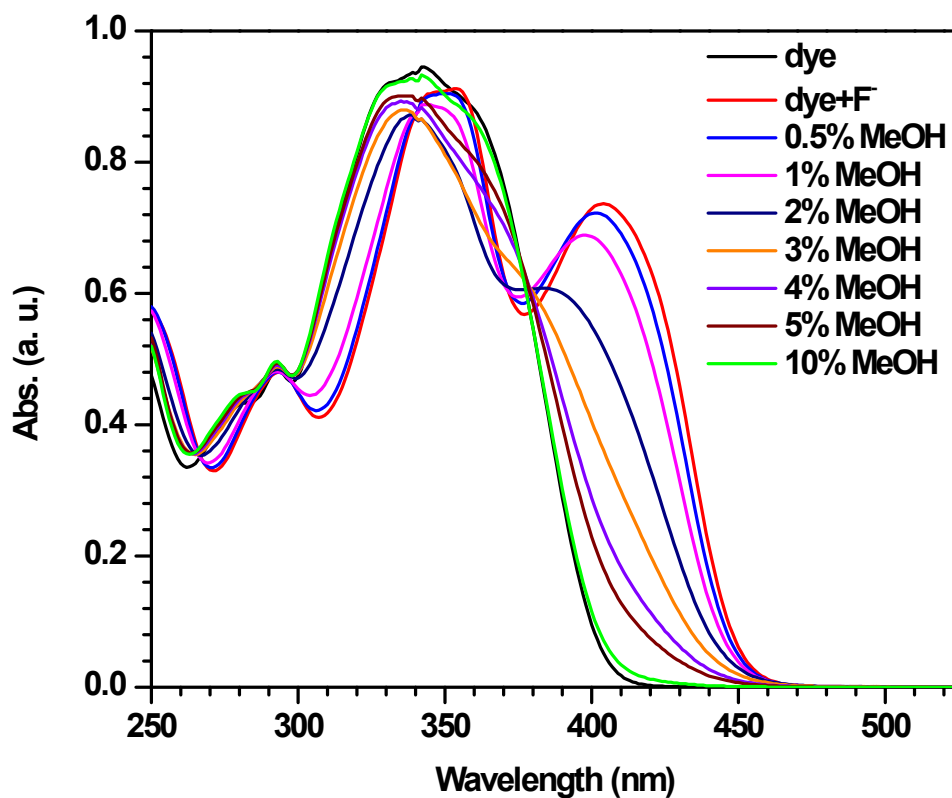

Fig. S2. Absorption spectra of **4a** + F<sup>-</sup> (20 equiv.) on addition of different amount of MeOH recorded in ACN

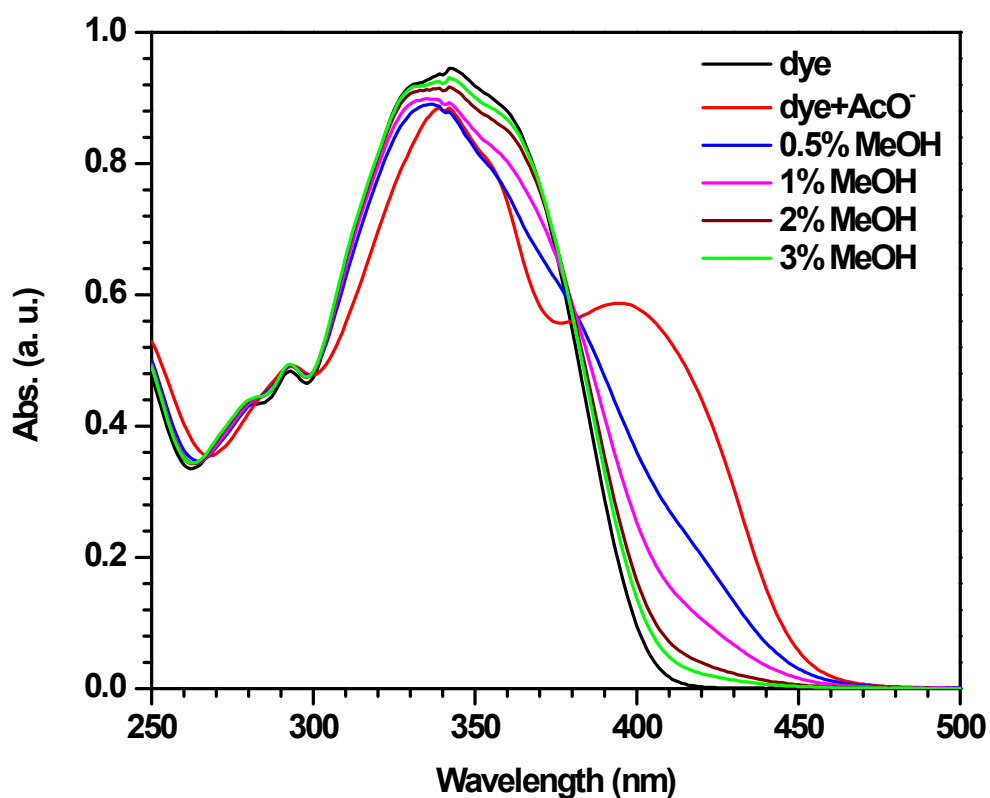

Fig. S3. Absorption spectra of **4a** +  $AcO^-$  (20 equiv.) on addition of different amount of MeOH recorded in ACN

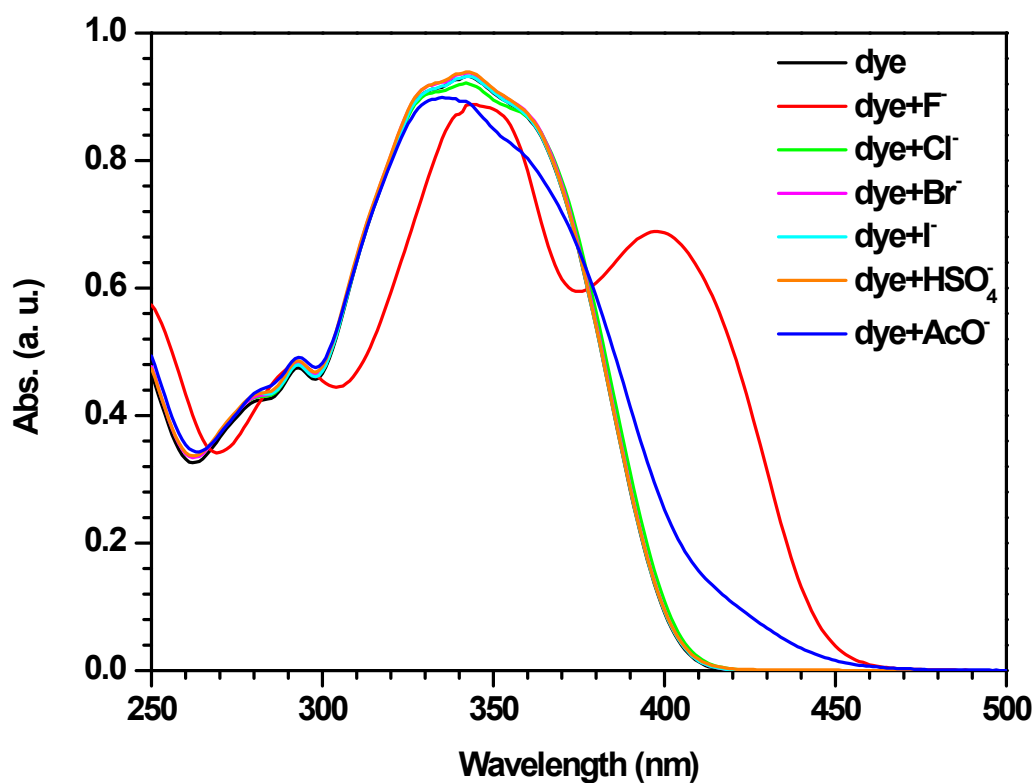

Fig. S4. Absorption spectra of **4a** after addition of 20 equiv. of different anions recorded in MeOH+ACN (1% v/v)

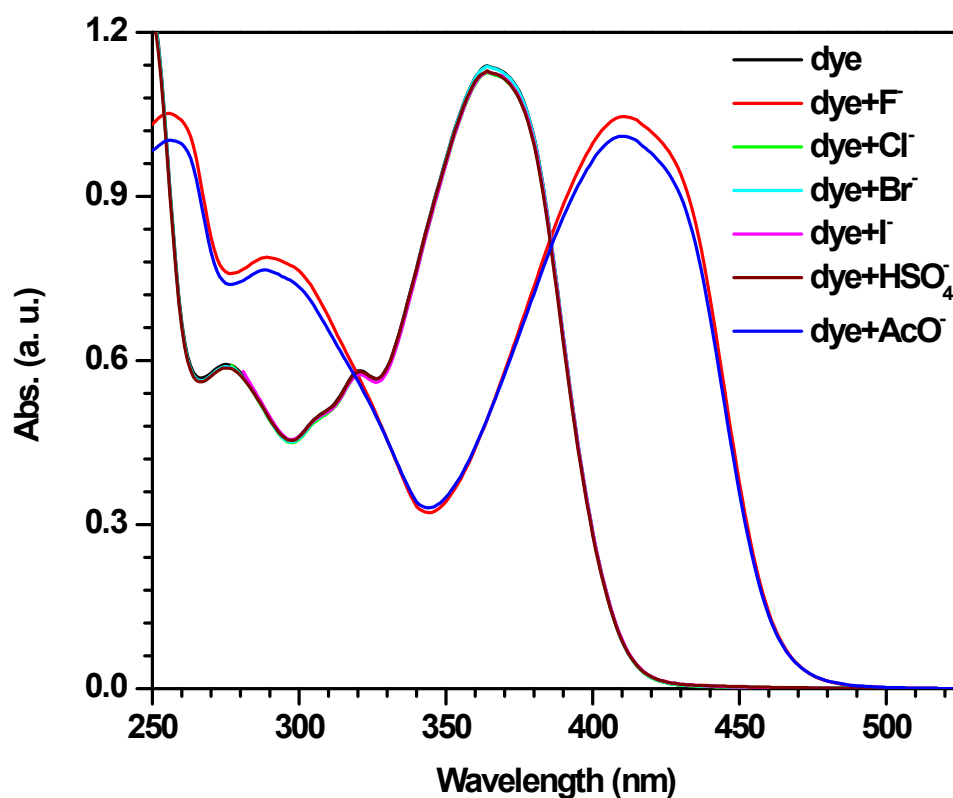

Fig. S5. Absorption spectra of **4b** after addition of 20 equiv. of different anions recorded in ACN

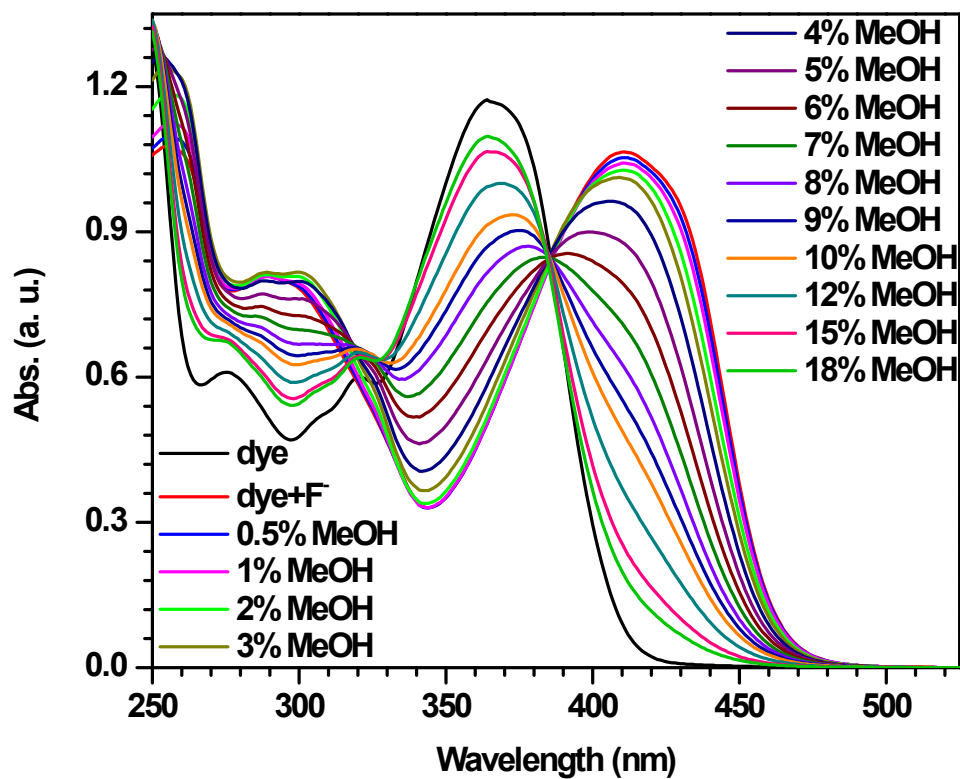

Fig. S6. Absorption spectra of **4b** + F<sup>-</sup> (20 equiv.) on addition of different amount of MeOH recorded in ACN

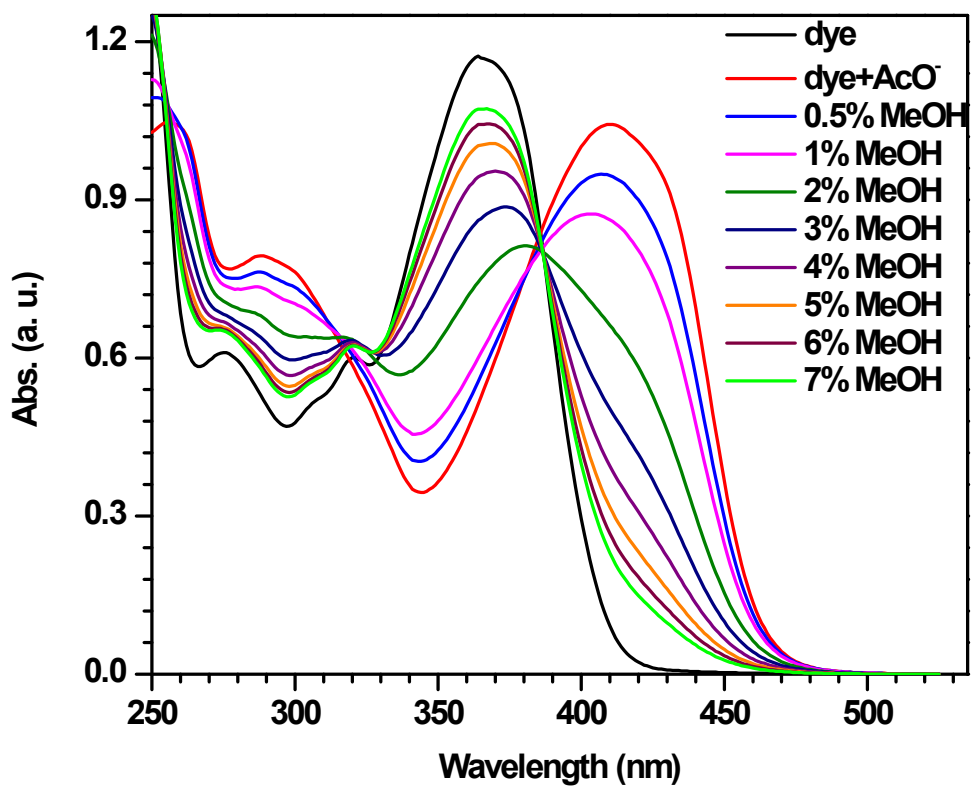

Fig. S7. Absorption spectra of **4b** +  $AcO^-$  (20 equiv.) on addition of different amount of MeOH recorded in ACN

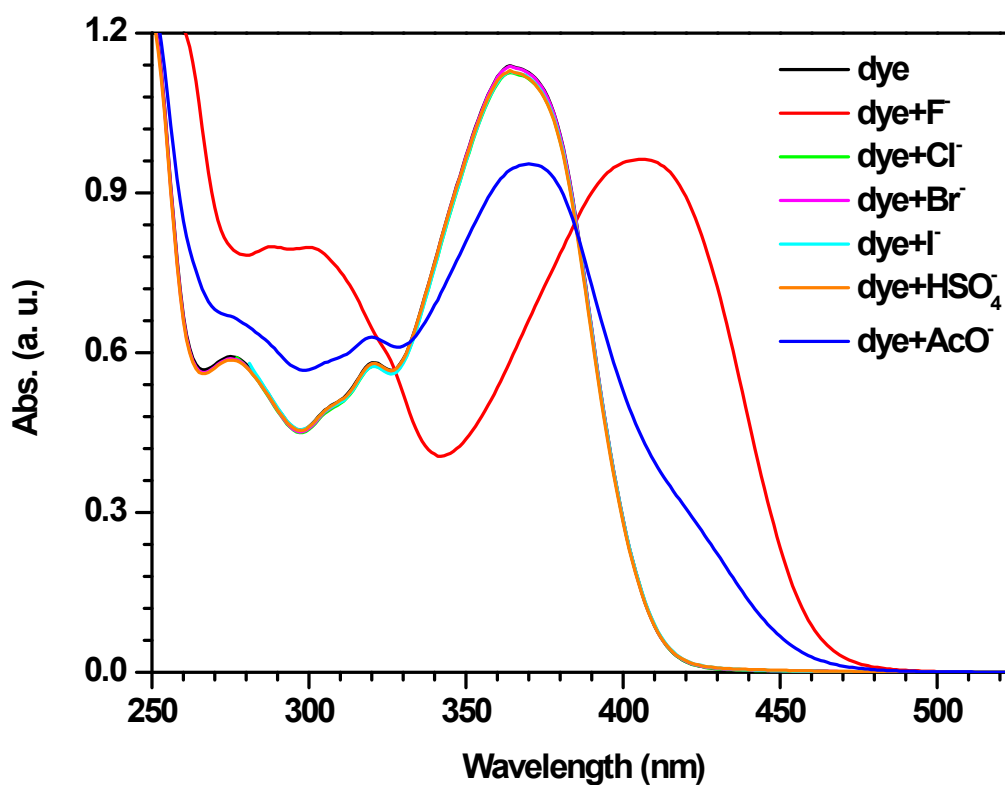

Fig. S8. Absorption spectra of **4b** after addition of 20 equiv. of different anions recorded in MeOH+ACN (4% v/v)

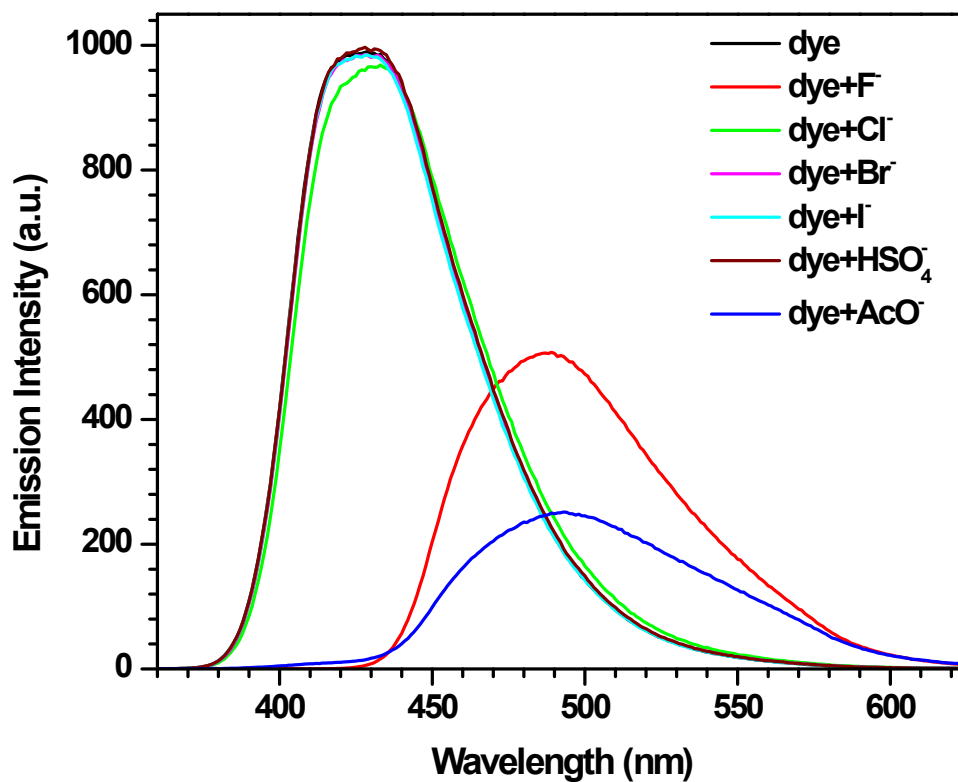

Fig. S9. Emission spectra of **4a** after addition of 20 equiv. of different anions recorded in ACN

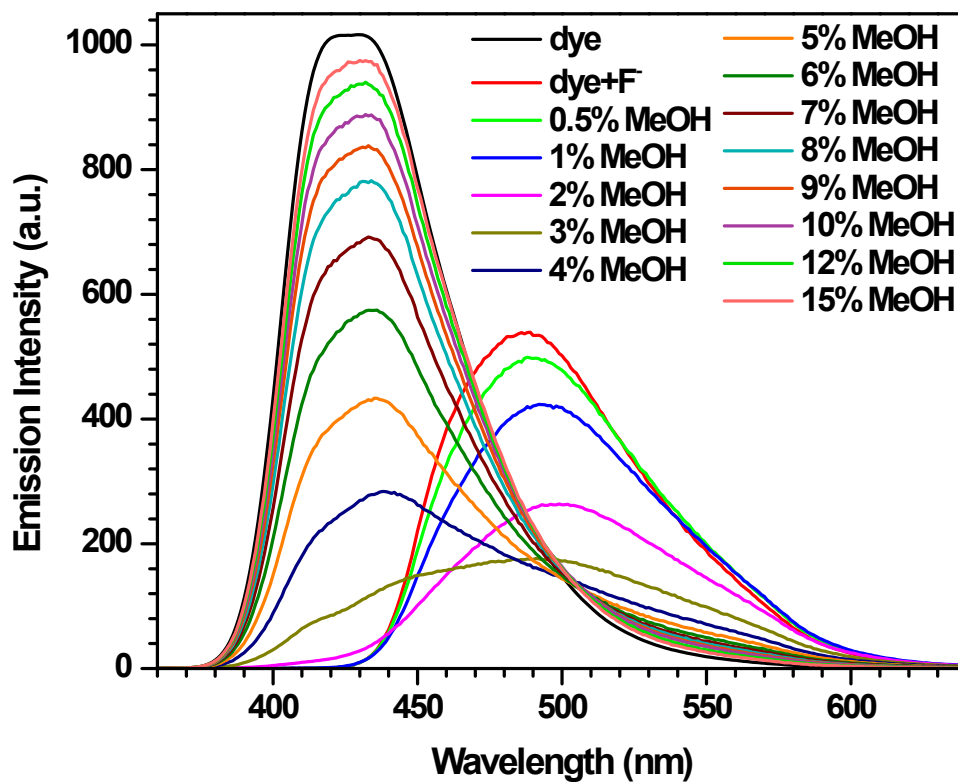

Fig. S10. Emission spectra of **4a** + F<sup>-</sup> (20 equiv.) on addition of different amount of MeOH recorded in ACN

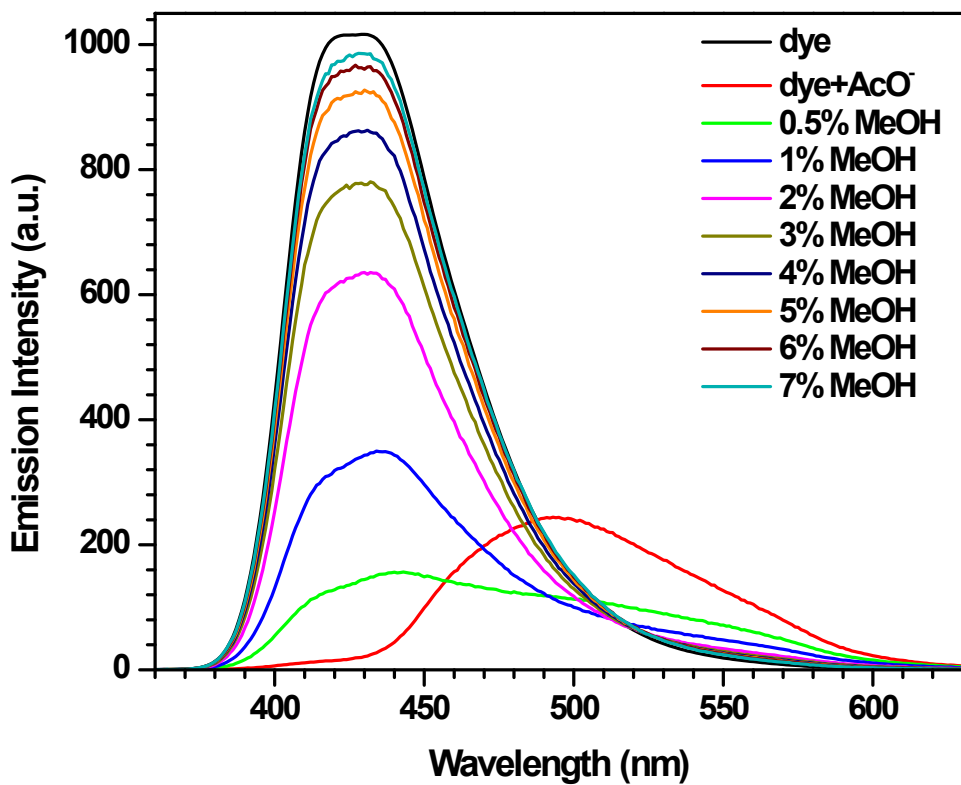

Fig. S11. Emission spectra of **4a** +  $AcO^-$  (20 equiv.) on addition of different amount of MeOH recorded in ACN

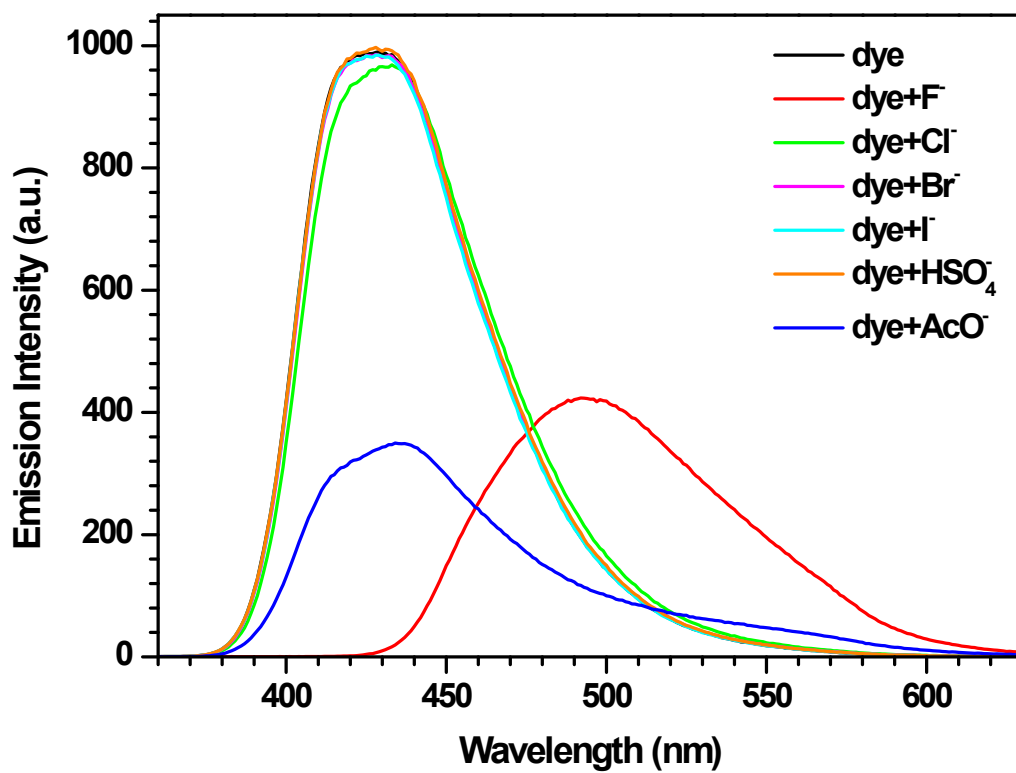

Figure S12 Emission spectra of **4a** after addition of 20 equiv. of different anions recorded in MeOH+ACN (1% v/v)



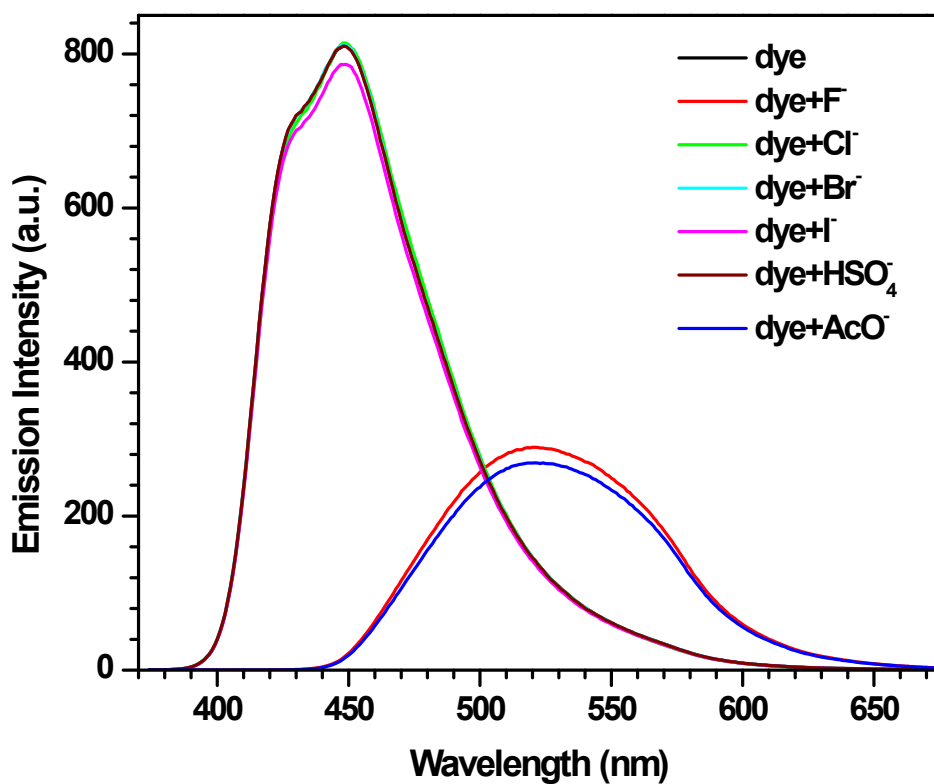

Fig. S13. Emission spectra of **4b** after addition of 20 equiv. of different anions recorded in ACN

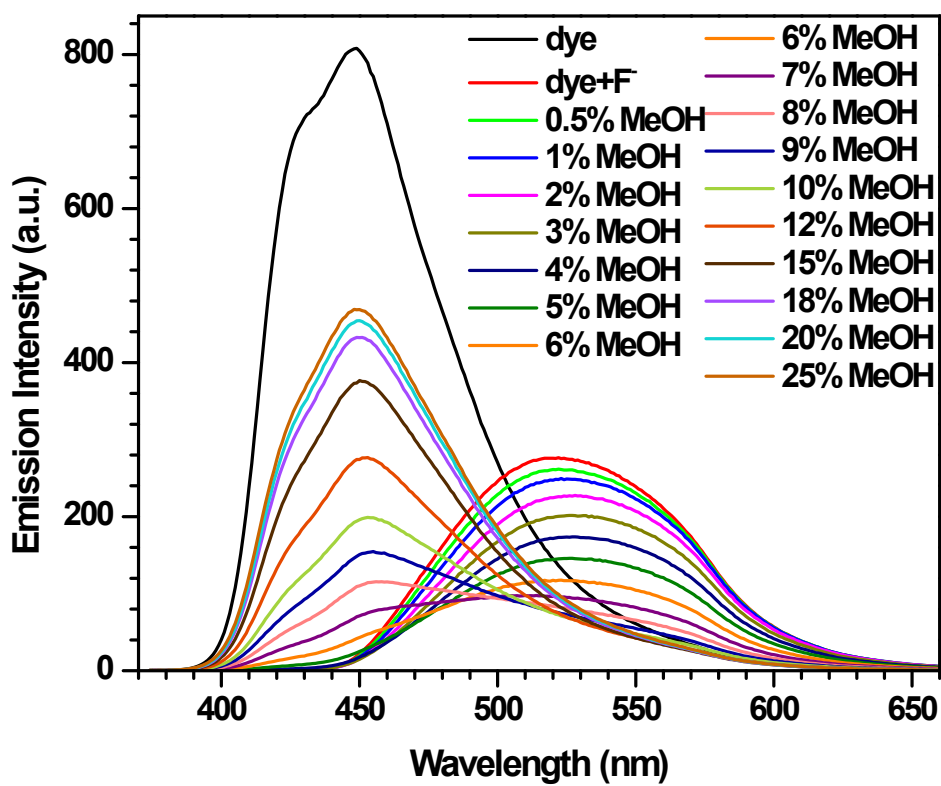

Fig. S14. Emission spectra of **4b** + F<sup>-</sup> (20 equiv.) on addition of different amount of MeOH recorded in ACN

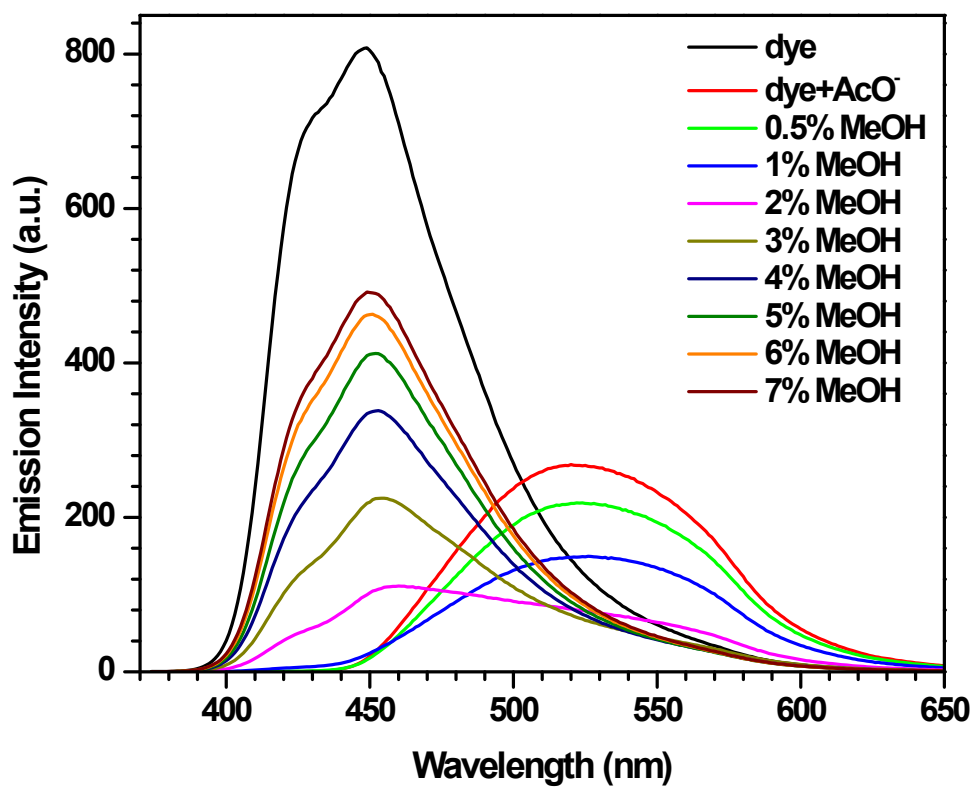

Fig. S15. Emission spectra of **4b** +  $AcO^-$  (20 equiv.) on addition of different amount of MeOH recorded in ACN

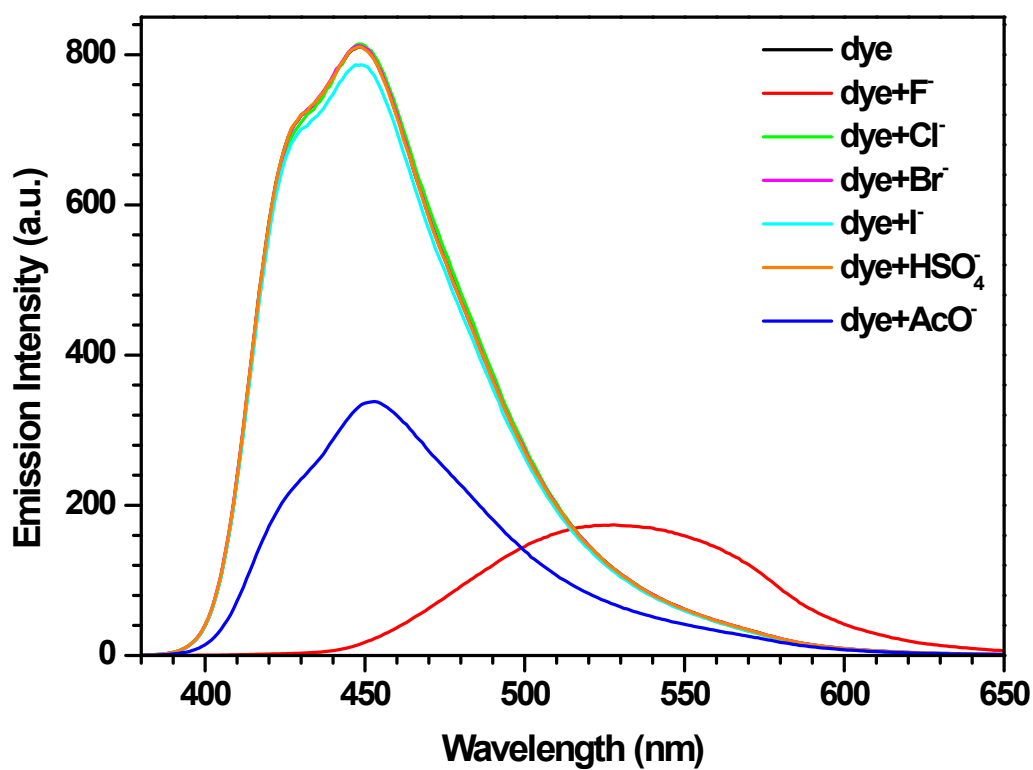

Fig. S16. Emission spectra of **4b** after addition of 20 equiv. of different anions recorded in MeOH+ACN (4% v/v)

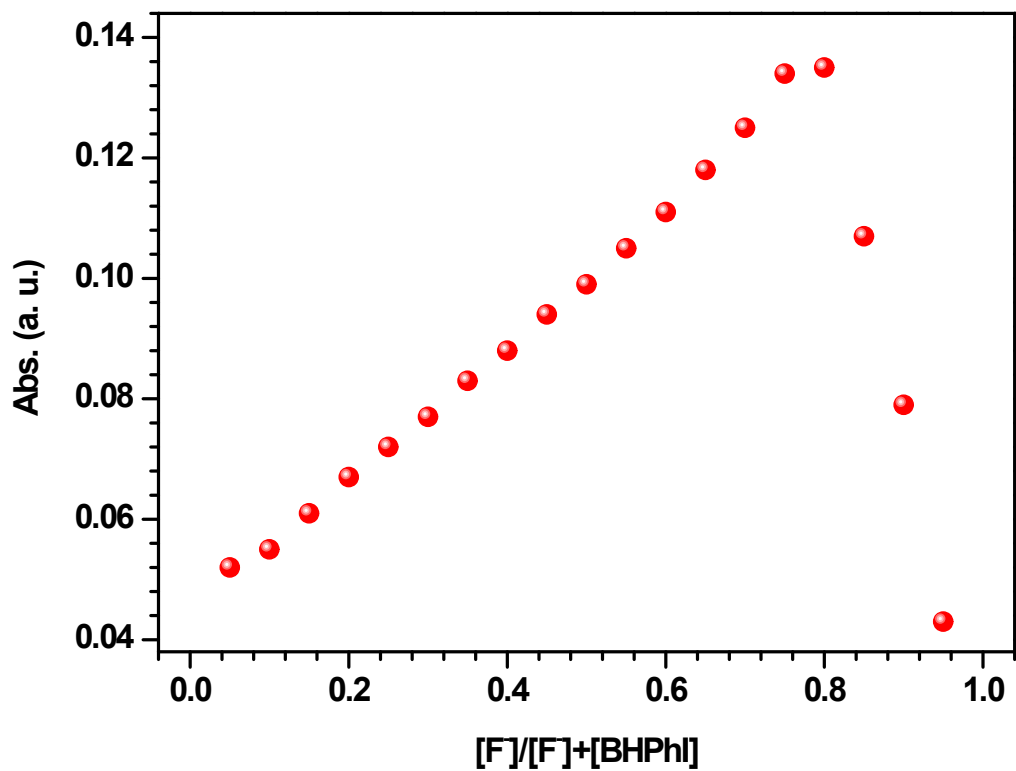

Figure S17. Job's plot for  $4a + F^-$ ;  $[receptor] + [guest] = 2 \times 10^{-5} M$

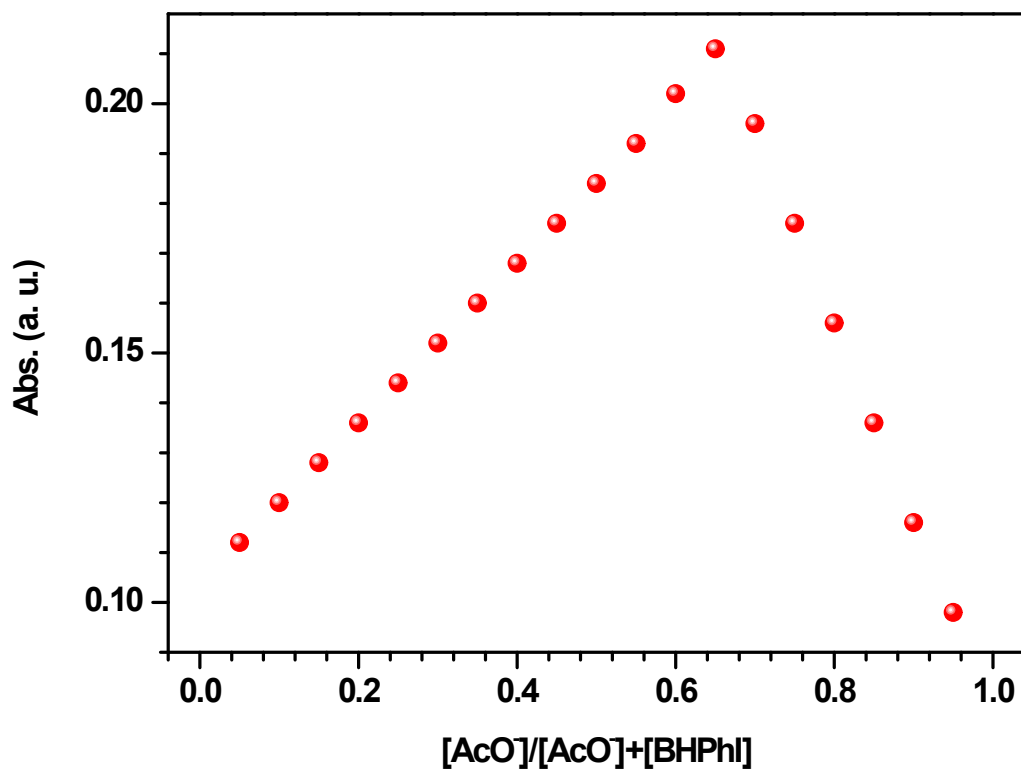

Fig. S18. Job's plot for  $4a + AcO^-$ ;  $[receptor] + [guest] = 2 \times 10^{-5} M$

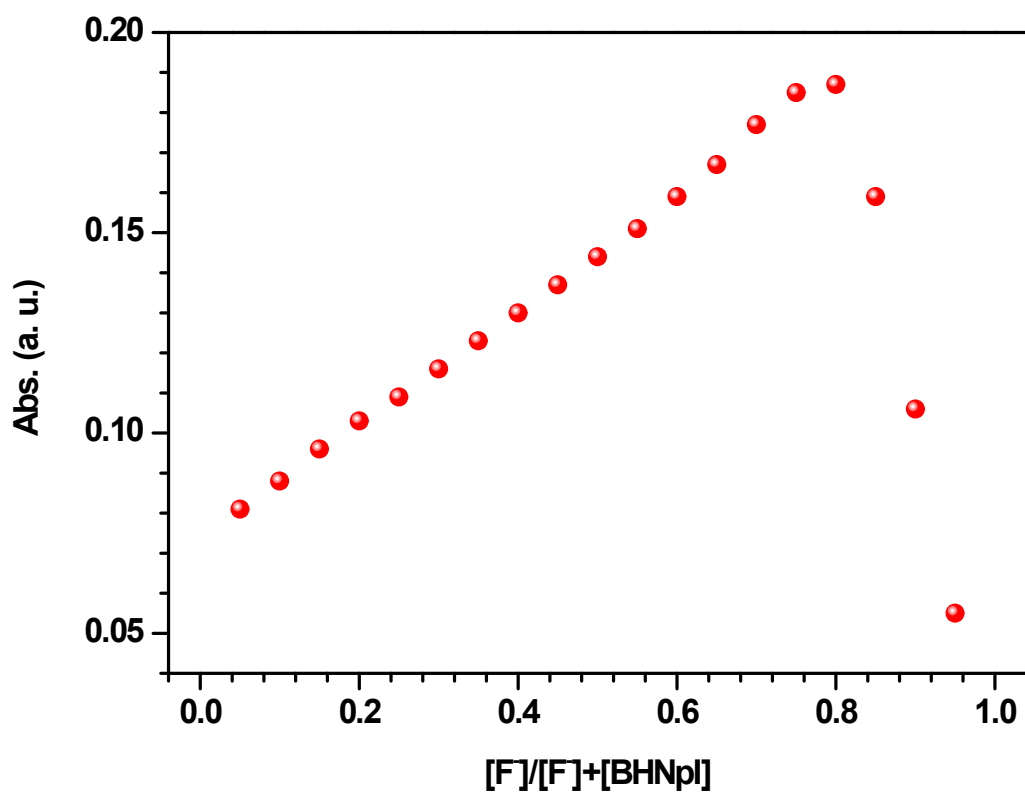

Fig. S19. Job's plot for  $4b + F^-$ ;  $[receptor] + [guest] = 2 \times 10^{-5} M$

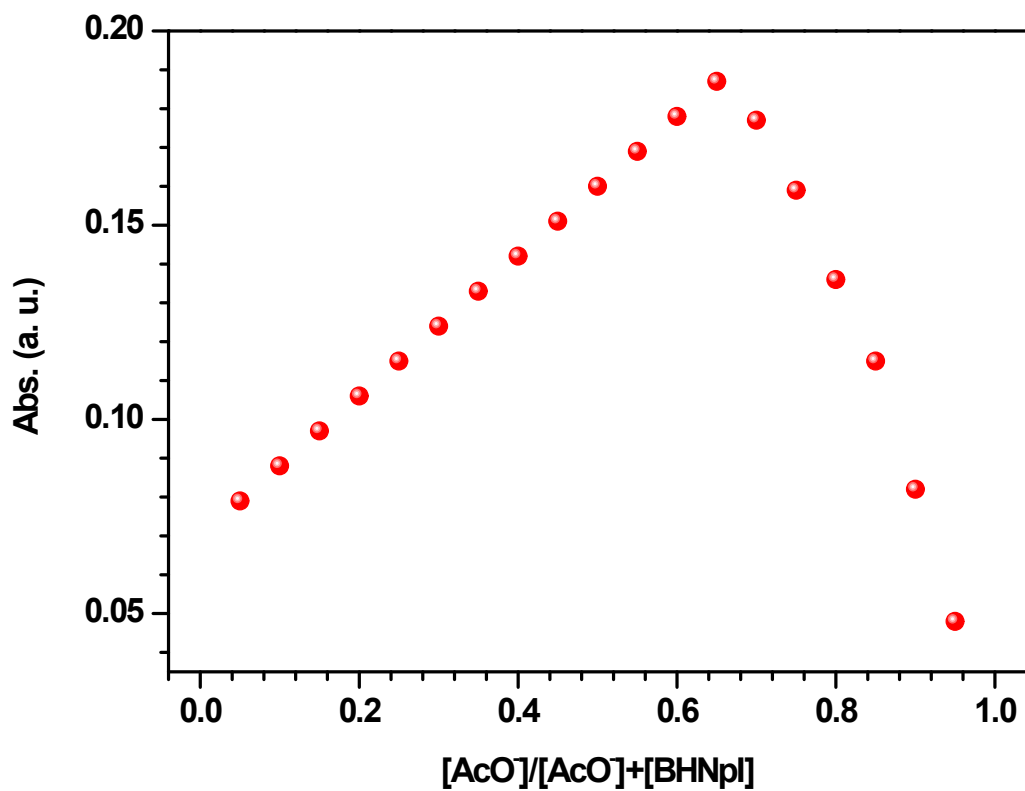

Fig. S20. Job's plot for  $4b + AcO^-$ ;  $[receptor] + [guest] = 2 \times 10^{-5} M$

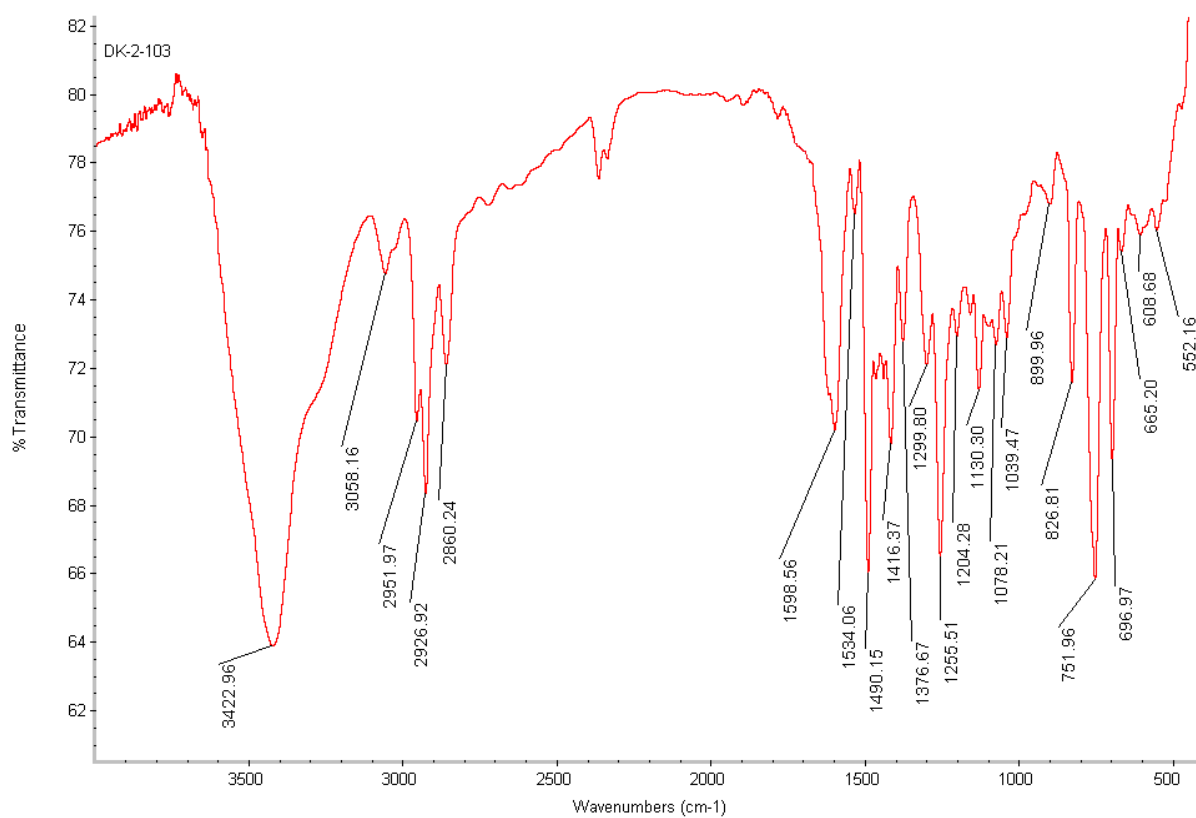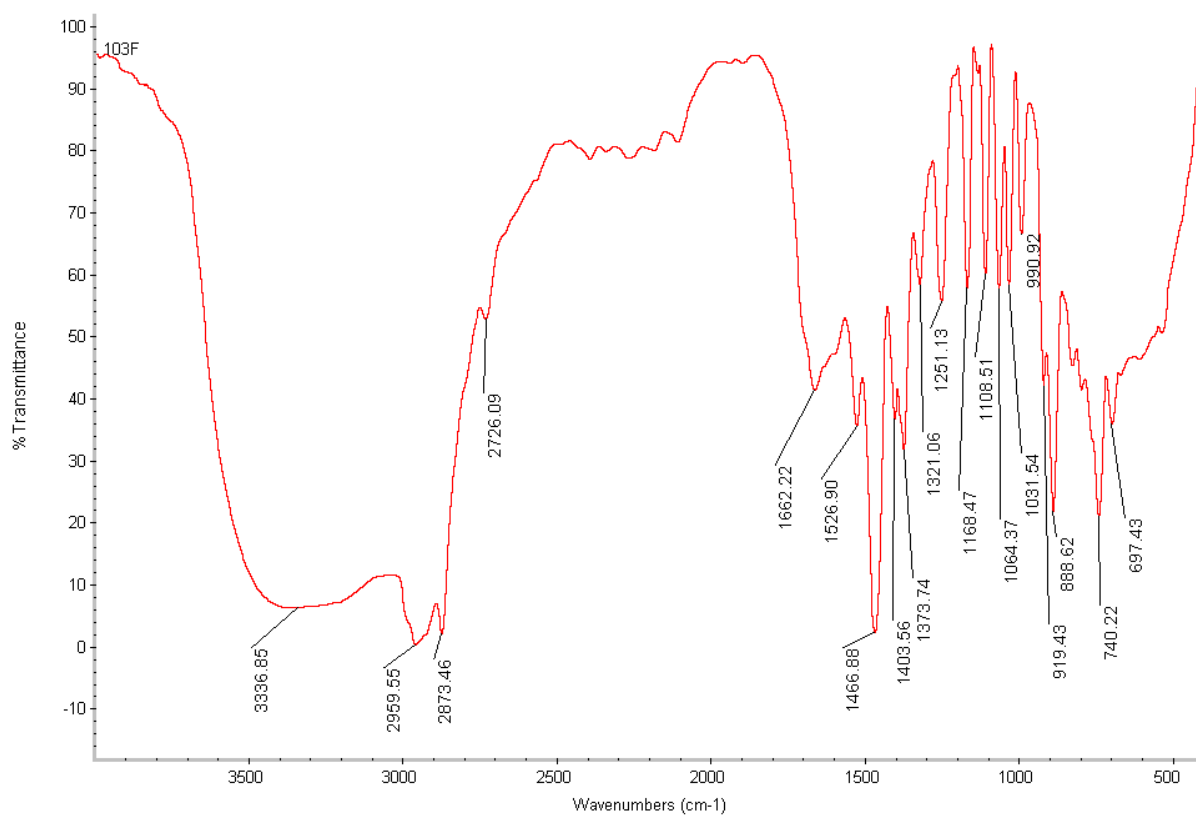

**Fig. S21** IR of **4a** only (top) and **4a** + TBAF (bottom)

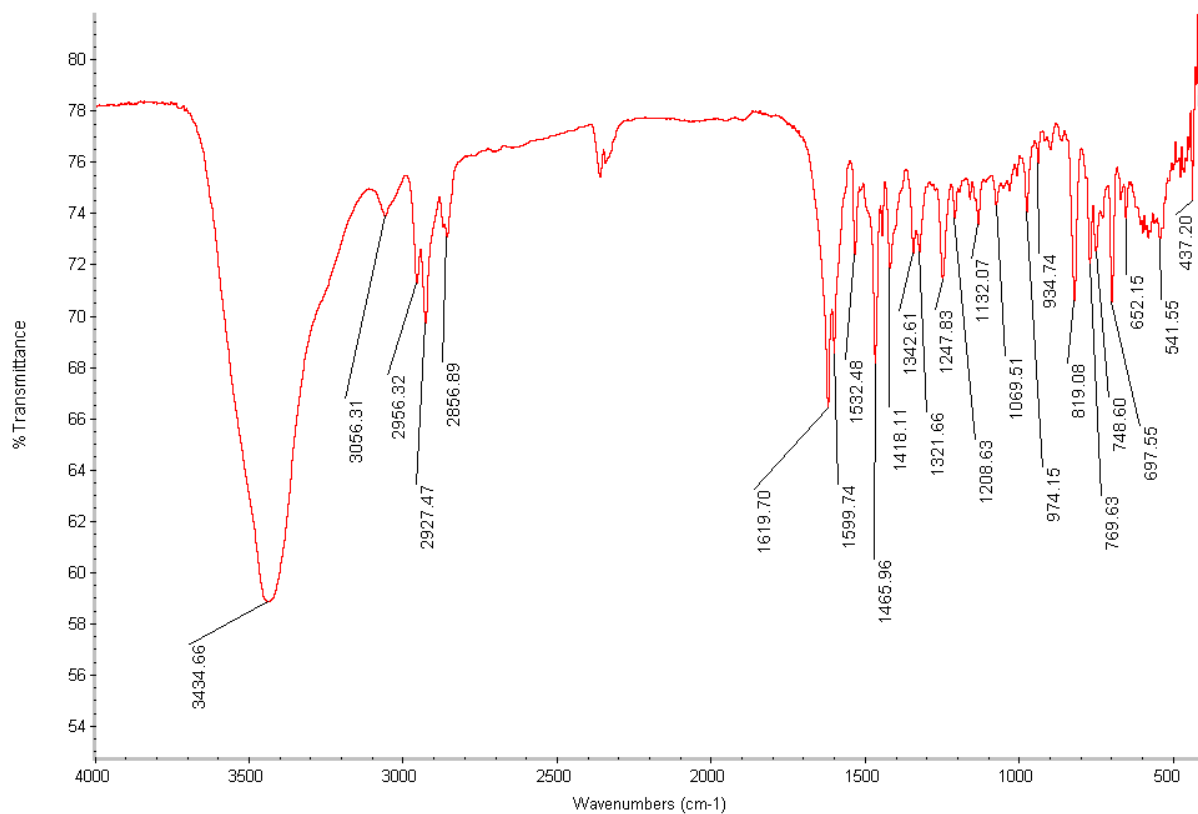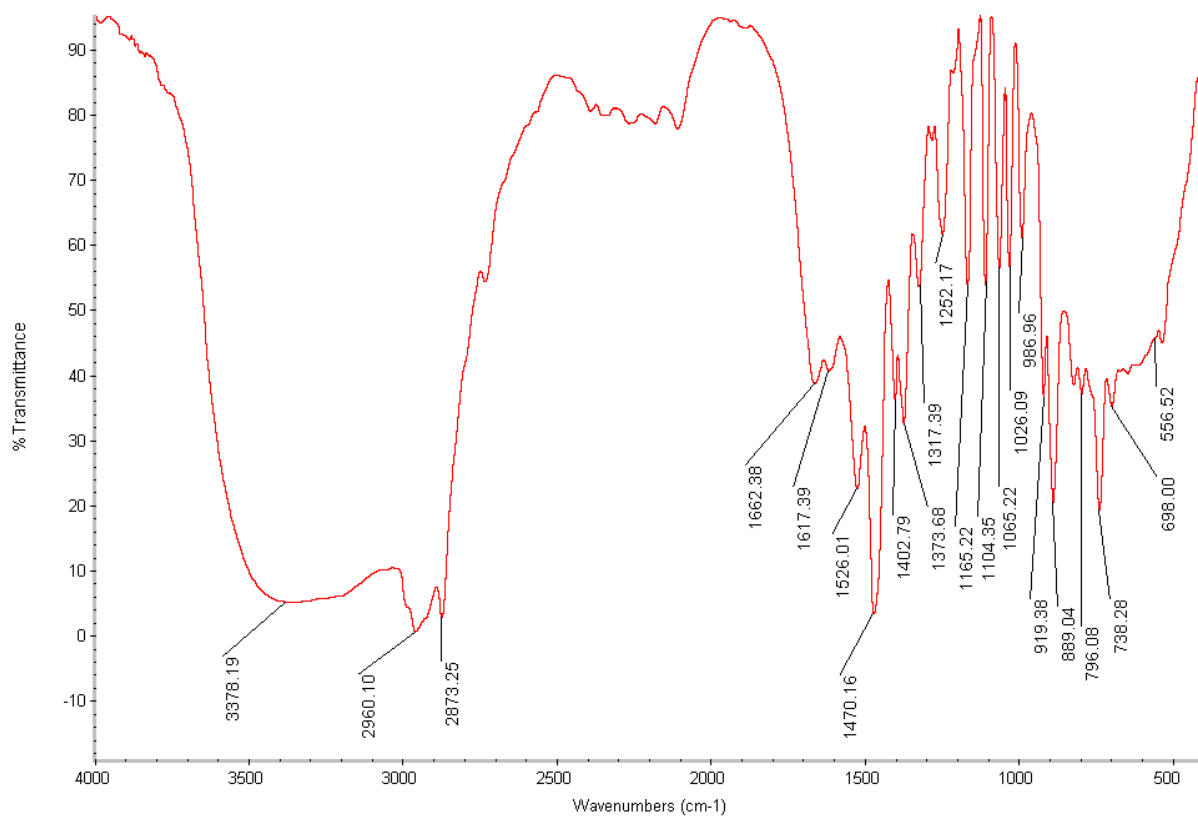

**Fig. S22.** IR of **4b** only (top) and **4b + TBAF** (bottom)

## Detection Limit Calculation

The limit of detection (LOD) of **4a** and **4b** in absorption as well in emission for the F<sup>-</sup> anion was estimated from the following equation

$$LOD = \frac{k \times \sigma}{slope}$$

where  $k = 3$ , and  $\sigma$  is standard deviation.

The calibration plot of absorption and emission for the **4a** and **4b** are presented below which provides the value of standard deviation ( $\sigma$ ) and slope. Thus using the above formula we got the LOD for F<sup>-</sup> anion in absorption and emission spectra.

LOD of **4a**: 0.049  $\mu\text{M}$  in absorption and 0.030  $\mu\text{M}$  in emission.

LOD of **4b**: 0.042  $\mu\text{M}$  in absorption and 0.041  $\mu\text{M}$  in emission.

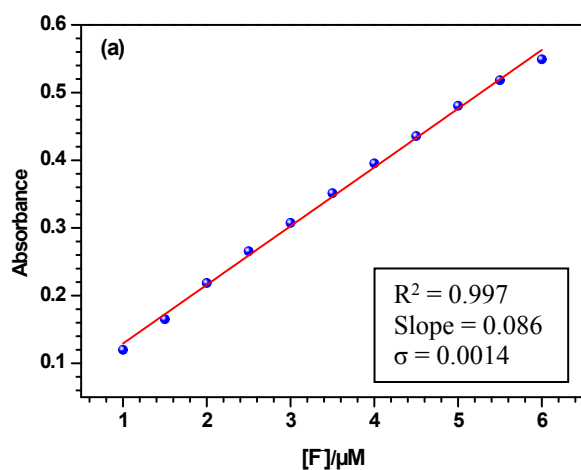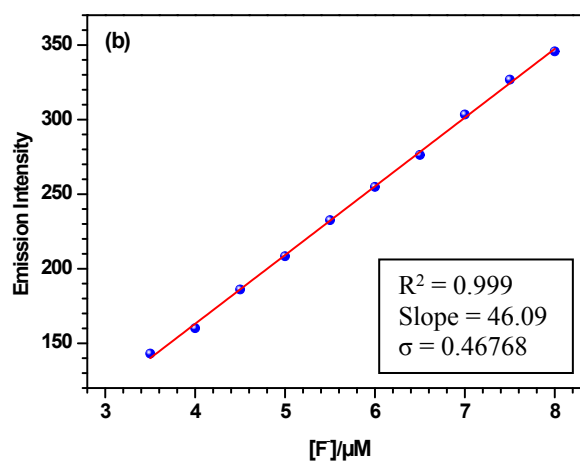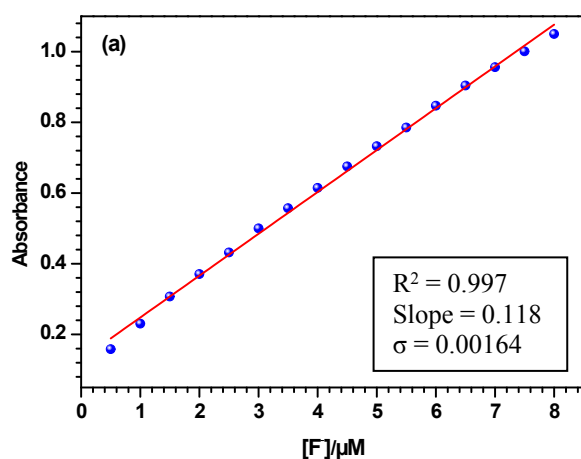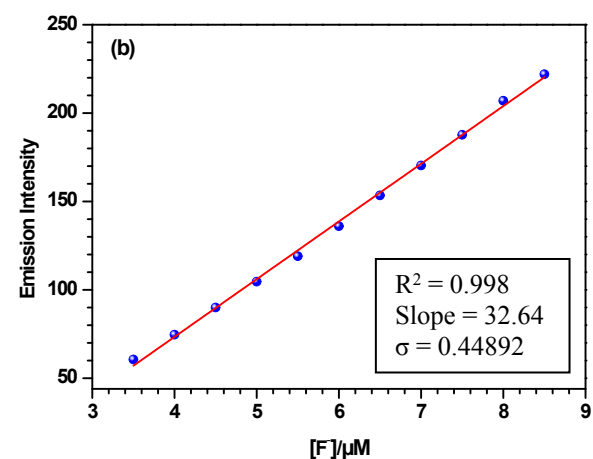

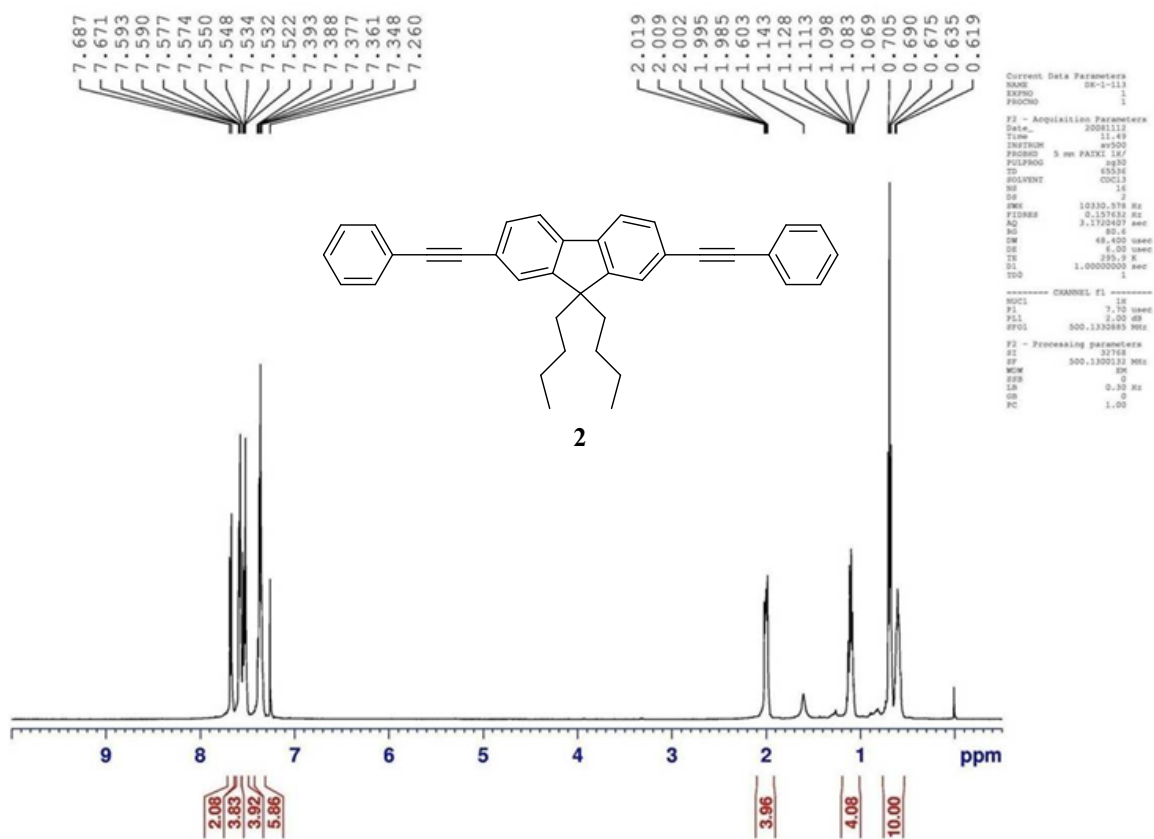

Fig. S23.  $^1\text{H}$  NMR spectra of **2** recorded in  $\text{CDCl}_3$

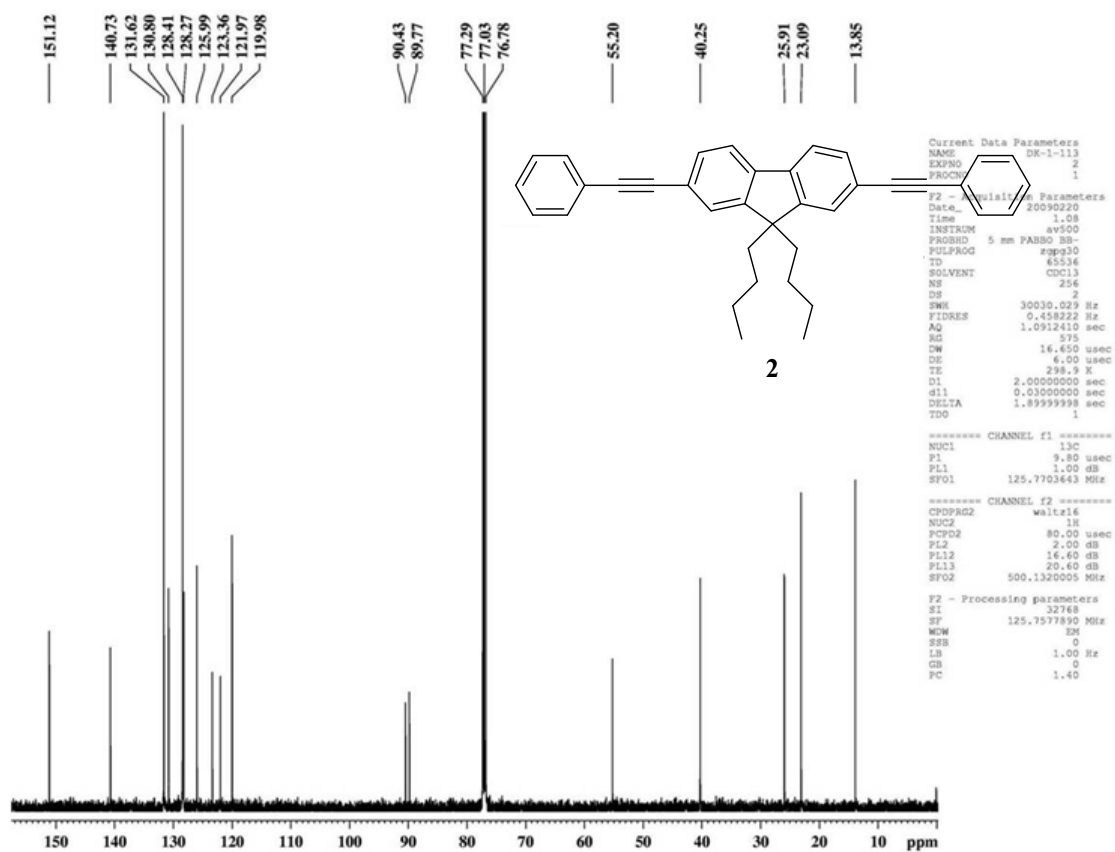

Fig. S24.  $^{13}\text{C}$  NMR spectra of **2** recorded in  $\text{CDCl}_3$



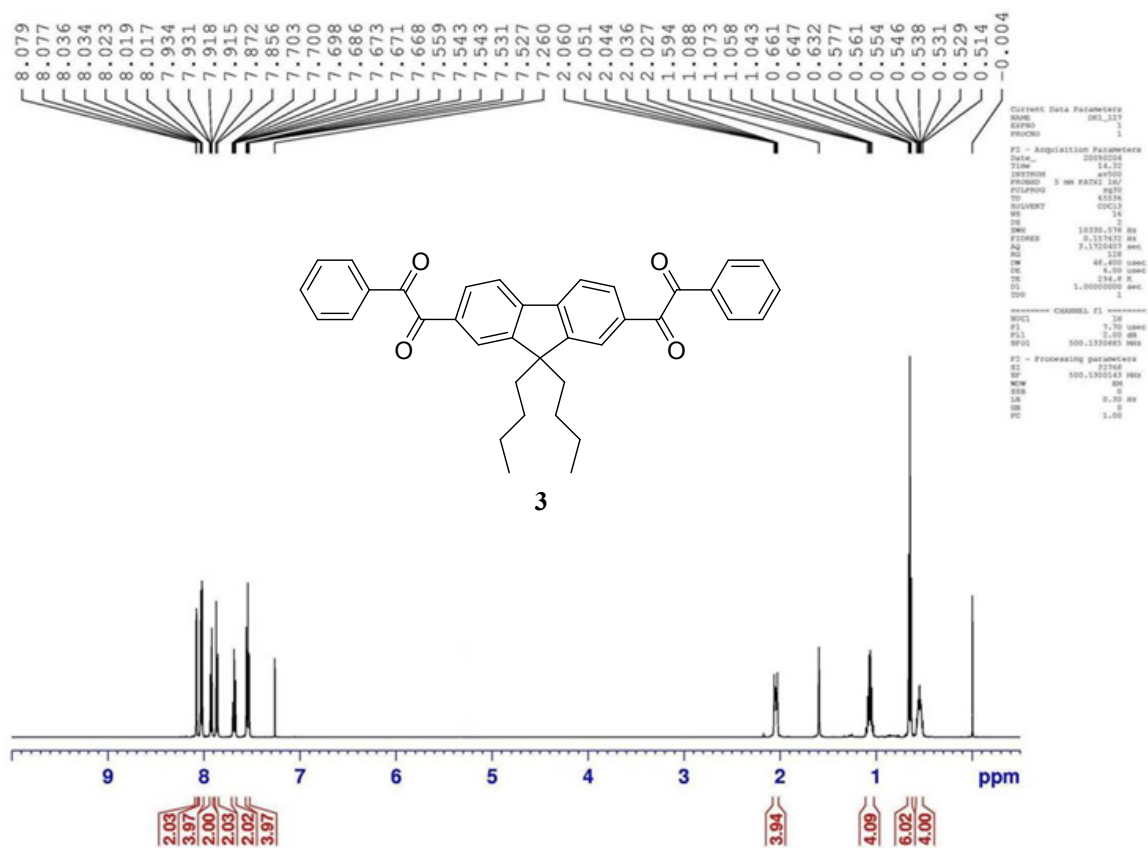

Fig. S25. <sup>1</sup>H NMR spectra of **3** recorded in CDCl<sub>3</sub>

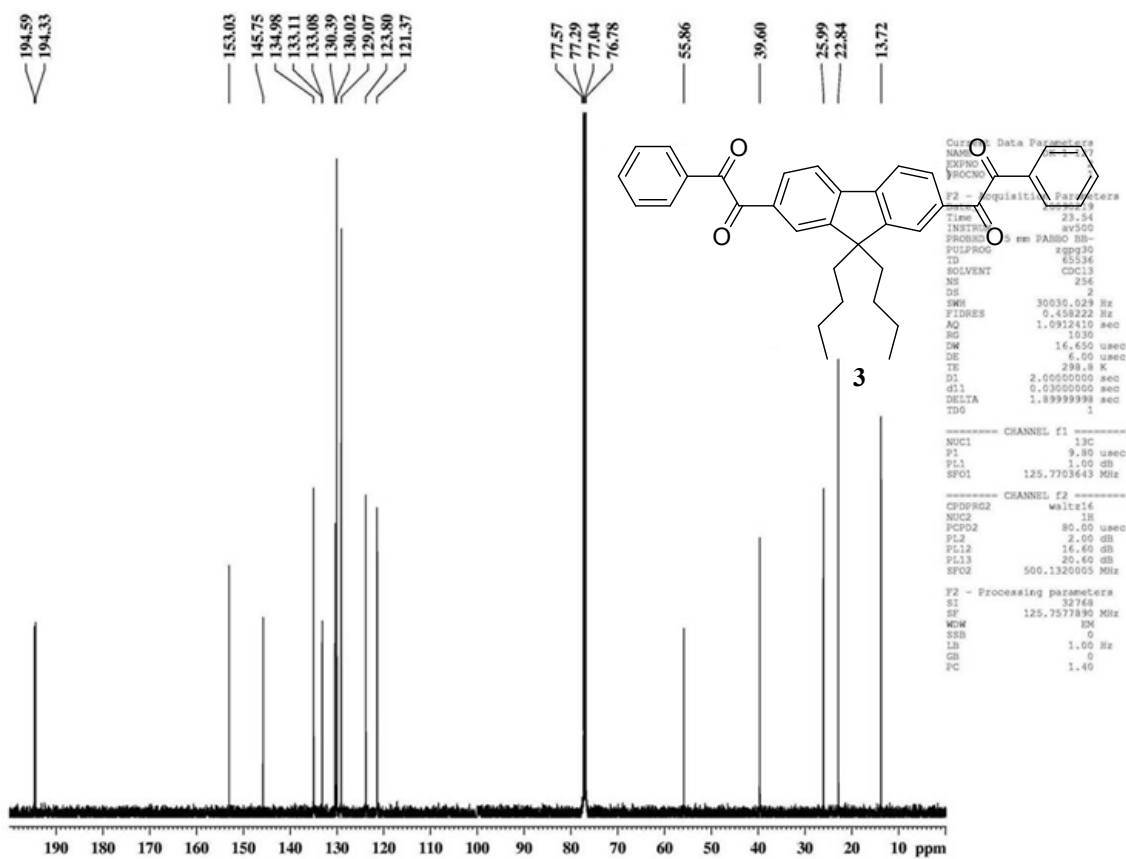

Fig. S26. <sup>13</sup>C NMR spectra of **3** recorded in CDCl<sub>3</sub>

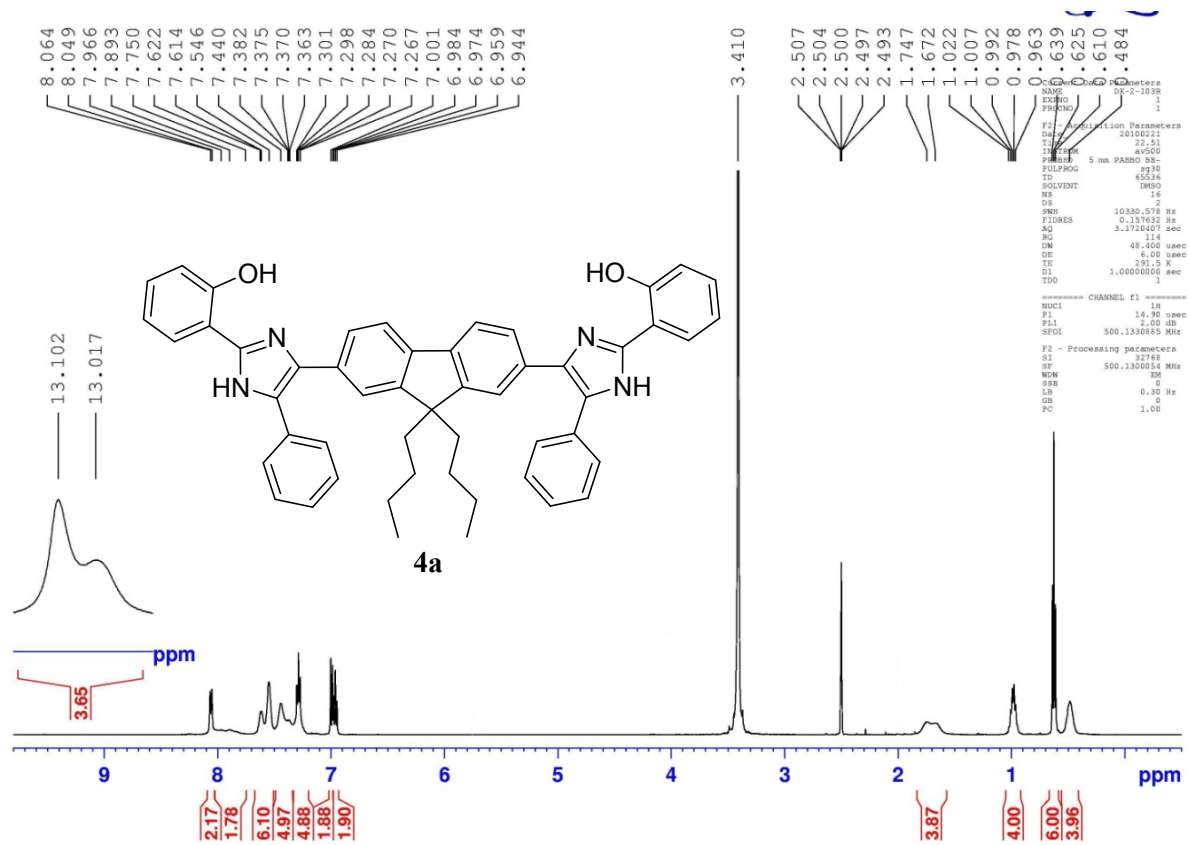

Fig. S27. <sup>1</sup>H NMR spectra of **4a** recorded in DMSO-*d*<sub>6</sub>

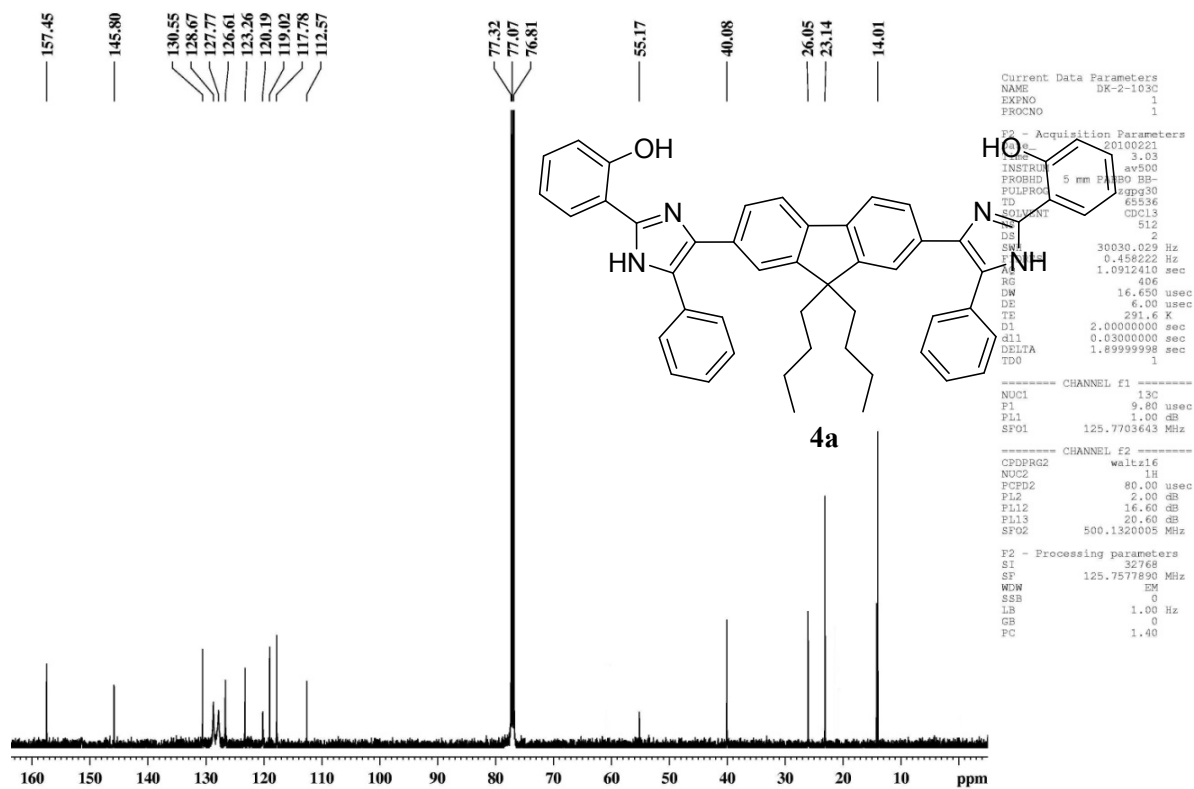

Fig. S28. <sup>13</sup>C NMR spectra of **4a** recorded in CDCl<sub>3</sub>

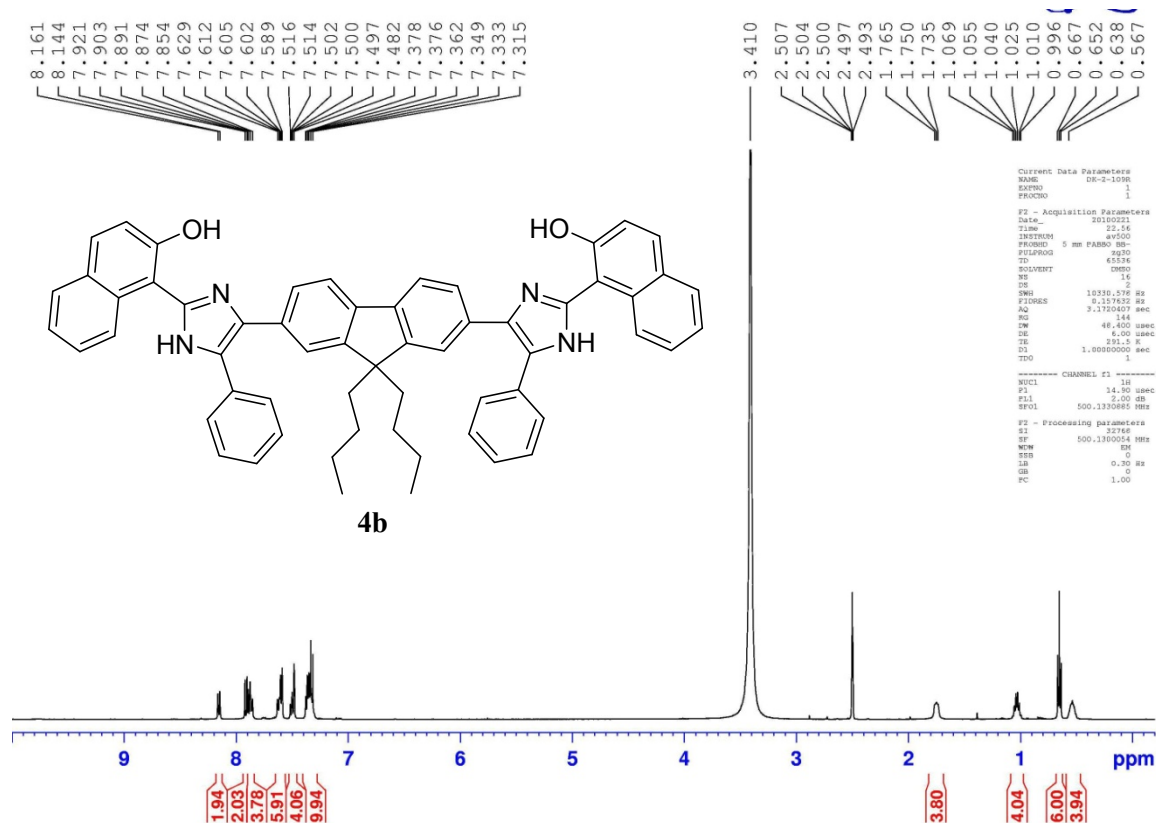

Fig. S29. <sup>1</sup>H NMR spectra of **4b** recorded in DMSO-*d*<sub>6</sub>

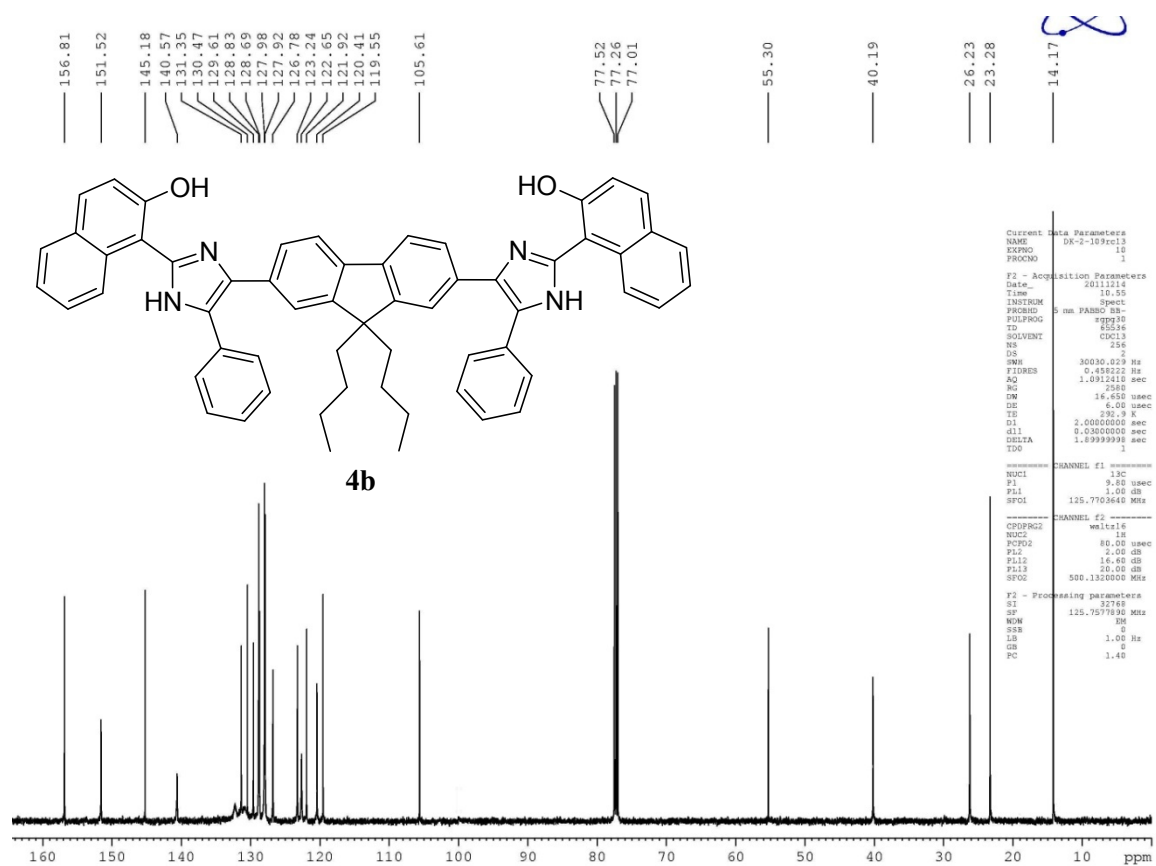

Fig. S30. <sup>13</sup>C NMR spectra of **4b** recorded in CDCl<sub>3</sub>
